# Supplementary material for: Development and validation of risk profiles of West African rural communities facing multiple natural hazards
Source: PLOS journal article supplement (doi:10.1371/journal.pone.0171921), 2017-03-01
Supplement: S8 (10.1371/journal.pone.0171921.s008) [file journal.pone.0171921.s008]

S3 Table. Indicator reference table for West Africa risk assessment.

| Vulnerability sub component         | Indicator                                      | Ghana | Burkina Faso | Benin |
|-------------------------------------|------------------------------------------------|-------|--------------|-------|
| Exposure of social system           | Agricultural dependent population              | √     | √            | √     |
|                                     | Insecure settlement                            | √     | √            | √     |
| Exposure of environmental system    | Agricultural area in hazard zones              | √     | √            | √     |
|                                     | Insecure farms (cropland in high slopes areas) | √     | √            | x     |
|                                     | Protected area in hazard zones                 | x     | x            | √     |
| Susceptibility of social system     | Number of dependents                           | √     | √            | x     |
|                                     | Population density                             | √     | √            | √     |
|                                     | Quality of housing                             | √     | √            | √     |
|                                     | Distance to drinking water source              | √     | x            | x     |
|                                     | Distance to food market                        | √     | x            | √     |
|                                     | Prevalence of stunted children                 | √     | x            | x     |
|                                     | Caloric intake per capita                      | √     | √            | √     |
|                                     | Prevalence of poverty                          | √     | x            | √     |
|                                     | Female headed households                       | √     | x            | x     |
| Susceptibility of ecological system | Degraded areas                                 | √     | √            | √     |
|                                     | Crop type (crop diversification practices)     | √     | x            | x     |
|                                     | Runoff                                         | x     | √            | √     |
|                                     | Dry season duration                            | x     | √            | √     |
|                                     | Erosion rates                                  | x     | x            | √     |
| Capacity – ecosystem robustness     | Soil organic matter                            | √     | x            | √     |
|                                     | Infiltration rates                             | √     | √            | x     |
|                                     | Groundwater level                              | √     | x            | √     |
|                                     | Water holding capacity                         | √     | x            | √     |
|                                     | Green vegetation cover                         | √     | √            | x     |
|                                     | Bas fonds                                      | x     | √            | x     |
|                                     | Agroforestry cover                             | x     | √            | x     |
|                                     | Soil depth (distance to bedrock)               | x     | √            | x     |
|                                     | Normalized Difference Vegetation Index         | x     | √            | x     |
| Coping capacity                     | Alternative food and income sources            | √     | √            | √     |
|                                     | Ability to survive crisis                      | √     | x            | √     |
|                                     | Social capital                                 | √     | x            | √     |
|                                     | Local knowledge                                | √     | √            | √     |
|                                     | Emergency management committee                 | √     | √            | √     |
| Adaptive capacity                   | Relief period of emergency items               | x     | √            | √     |
|                                     | Access to agric and health extension officers  | √     | √            | √     |
|                                     | Average annual household income per capita     | √     | √            | √     |
|                                     | Literacy levels                                | √     | √            | √     |
|                                     | Tropical livestock units ( Number of herds)    | √     | √            | √     |
|                                     | Gross margin per hectare                       | √     | x            | √     |
|                                     | Farm labour availability                       | √     | x            | x     |
|                                     | Access to farmland                             | x     | x            | √     |
